# Supplementary material for: Growth of two-dimensional formamidine lead halide perovskite single-crystalline sheets and their optoelectronic properties
Source: Royal Society of Chemistry journal article supplement (doi:10.1039/d0cc06957d), 2021-01-01
Supplement: d0cc06957d1.pdf [file d0cc06957d1.pdf]

## Electronic Supplementary Information

### Growth of Two-dimensional Formamidinium Lead Halide Perovskites Single-crystalline Sheets and Their Optoelectronic Properties

Na Lu<sup>a</sup>, Di Wang<sup>\*, a, b</sup>, Meina Han<sup>a</sup>, Bojin Zhu<sup>a</sup>, Guozheng Wu<sup>a</sup>, Zhanggui Hu<sup>\*, a</sup>

<sup>a</sup> Institute of Functional Crystals, and Tianjin Key Laboratory of Functional Crystal Materials, Tianjin University of Technology, Tianjin 300384, China.

<sup>b</sup> Physics and Electronic Engineering School, Jiangsu Second Normal University, Nanjing 210013, China

E-mail: [diwang@tjut.edu.cn](mailto:diwang@tjut.edu.cn) [Hu@mail.ipc.ac.cn](mailto:Hu@mail.ipc.ac.cn)

#### Experimental Procedures

**Two-dimensional FAPbX<sub>3</sub> growth.** 2D FAPbX<sub>3</sub> and FAPbBr<sub>3-x</sub>I<sub>x</sub> single-crystalline sheets were grown on the fluorophlogopite mica substrate. The growth processes included two steps, the precursor solution preparation and 2D sheet growth, which were similar to our previous works.<sup>1</sup>

For the precursor solution preparation, formamidinium bromide (FABr, >99% Sigma-Aldrich), methylammonium bromide (MABr, >99% Sigma-Aldrich), and Lead( II ) bromide (PbBr<sub>2</sub>, 99.999% Sigma-Aldrich) were mixed in the stoichiometry ratio of MAPbBr<sub>3-x</sub>I<sub>x</sub> (x=0~3), and dissolved in a solution mixture of N,N-dimethylformamide (DMF, 99.5%-Sigma Aldrich) and  $\gamma$ -butyrolactone (GBL, 99.5%-Sigma Aldrich). The volume ratio of DMF : GBL was 1 : 1. The mixture was put under the nitrogen environment and stirred at 80°C for 24h until tiny orange FAPbBr<sub>3</sub> crystals appeared. After that, the solution was filtered using a 0.3  $\mu$ m pore-sized PTFE filter to remove the precipitations and obtained a clear precursor solution (1.0 M). Oleic acid (OA, >99% Sigma-Aldrich) was added into the prepared precursor solution in a volume ratio of 8 : 2 (solution : OA).

For 2D sheet growth, one fluorophlogopite mica (single crystals, Taiyuan) was cleaved into two pieces as the substrate and cover, respectively. The 50  $\mu$ L precursor solution was dripped on the surface, then covered using the other mica. This growth system was fixed on the stage and spin at 3000 r.p.m. for the 30s under an N<sub>2</sub> environment. After that, the growth system was heated using the hot stage for 24h at 80°C, resulting in the growth of ultrathin 2D FAPbBr<sub>3</sub> single-crystalline sheets on the mica surfaces. Finally, the as-grown 2D sheets were washed using

cyclohexane to remove the residual OA.

**Characterization.** The grazing incidence X-ray diffraction (GIXRD) analysis was performed using Rigaku Smartlab with  $\text{CuK}\alpha$  in a  $\theta$ - $2\theta$  scan mode. X-ray photoelectron spectroscopy (XPS) was measured by Thermo scientific Escalab 250Xi. Photoluminescence (PL) and time-resolved photoluminescence (TRPL) spectrum of single crystals were measured with Edinburgh Instruments FLS 980 spectrometer that coupled with optical microscopy. PL mapping of crystal surface was measured with Witec alpha300RA with the excitation source of a 405nm fiber-coupled laser. The UV-visible absorption spectra were recorded under a Hitachi UH4150 spectrometer. Scanning electronic microscope (SEM) and energy-dispersive X-ray (EDS) spectroscopy were performed using a Zeiss Merlin system. High-resolution transmission electron microscopy were observed using a FEI Talos F200X.

**Optoelectronic device fabrication and measure.** The as-grown 2D  $\text{FAPbBr}_3$  sheets were placed into the thermal evaporator under the pressure of  $1.0 \times 10^{-6}$  mbar, and a 100 nm of Au electrodes were deposited on the sheet surface with a shadow mask. The devices were illuminated using a semiconductor diode laser CNI MDL-XS-405, and the photocurrents were generated and measured using Keithley 2614B source meter with a probe station. The active device area was about  $50 \mu\text{m}$  estimated by the bias gaps multiplied by the sheet width. The laser power was obtained using an optical power meter (Thorlabs, S121C). The time-dependent photoresponse signal was recorded using a digital oscilloscope (National Instruments, PXI-5122). All experimental measurements were carried out at room temperature.

## Results and Discussion

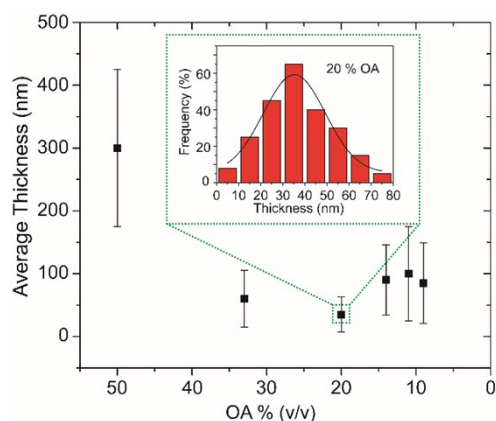

**Figure S1** The average thicknesses of 2D FAPbBr<sub>3</sub> sheets that grown from the precursor solutions with various OA concentrations (volume percent). The inset is the histogram and distribution of the sheet thicknesses for the 20 % OA solution.

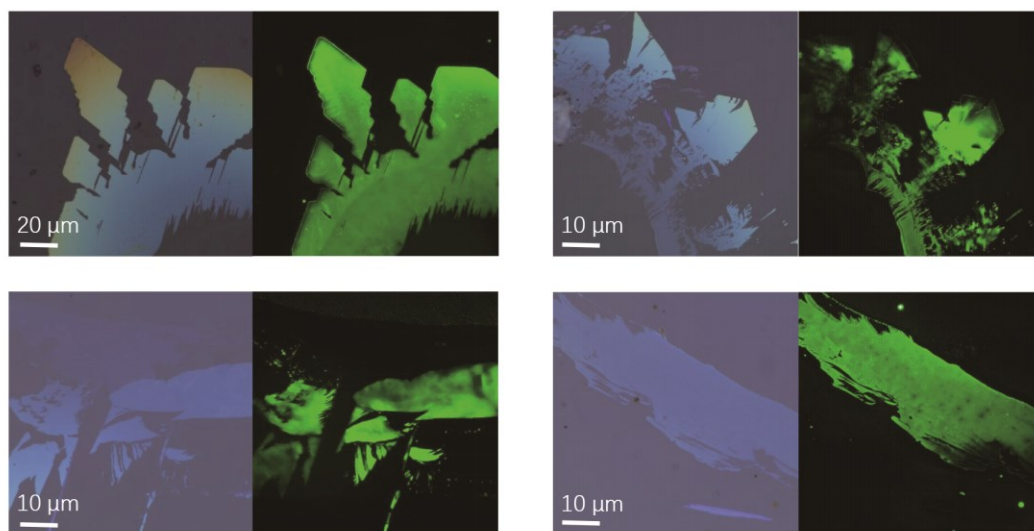

**Figure S2** Optic and fluorescent images of 2D FAPbBr<sub>3</sub> sheets grown on the mica substrate

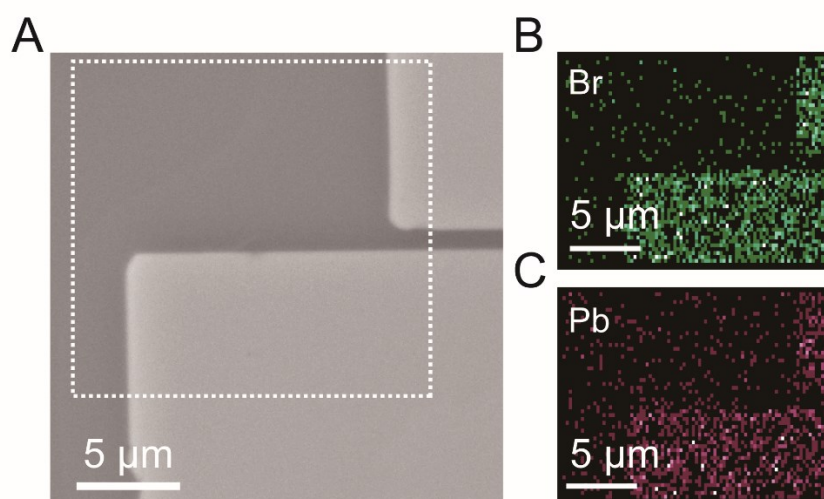

**Figure S3** The SEM image (A) and EDS element mapping images of Br (B) and Pb (C) of 2D FAPbBr<sub>3</sub> sheets on the mica substrate.

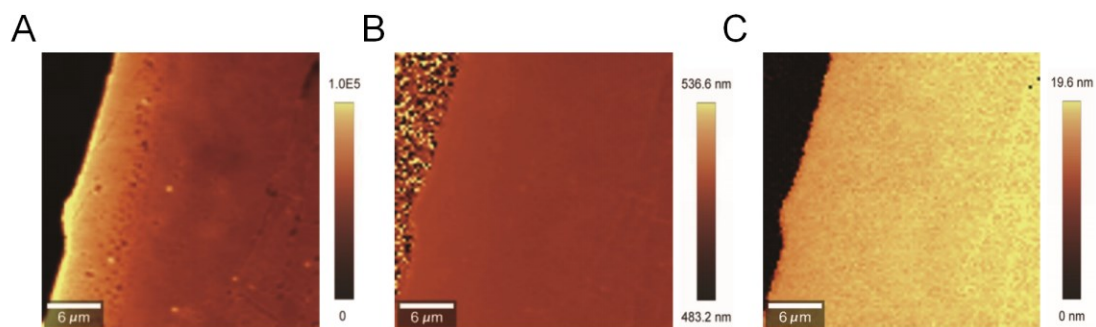

**Figure S4** PL emission intensity, peak value, and FWHM distributions of the single-crystalline 2D FAPbBr<sub>3</sub> sheet

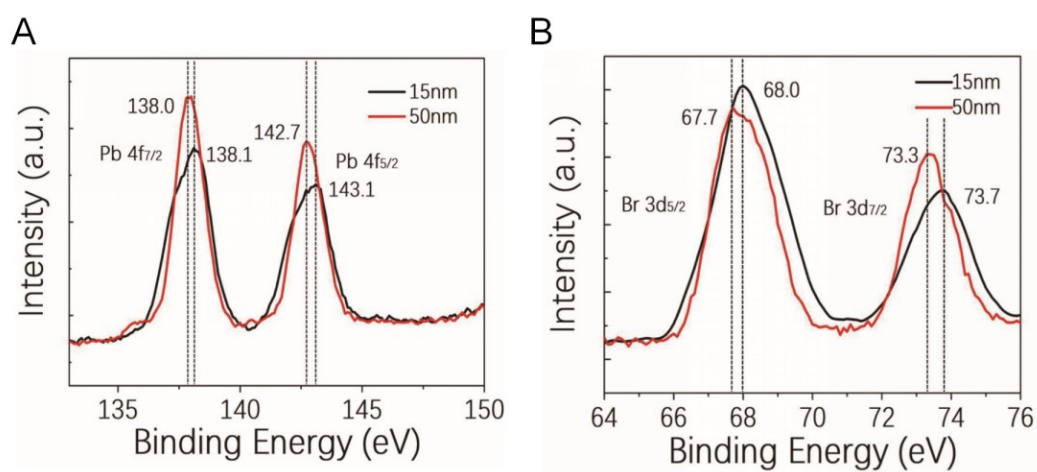

**Figure S5** Pb 4f and Br 3d XPS spectra for two single-crystalline 2D FAPbBr<sub>3</sub> sheets with the 15 and 50 nm thicknesses, respectively.

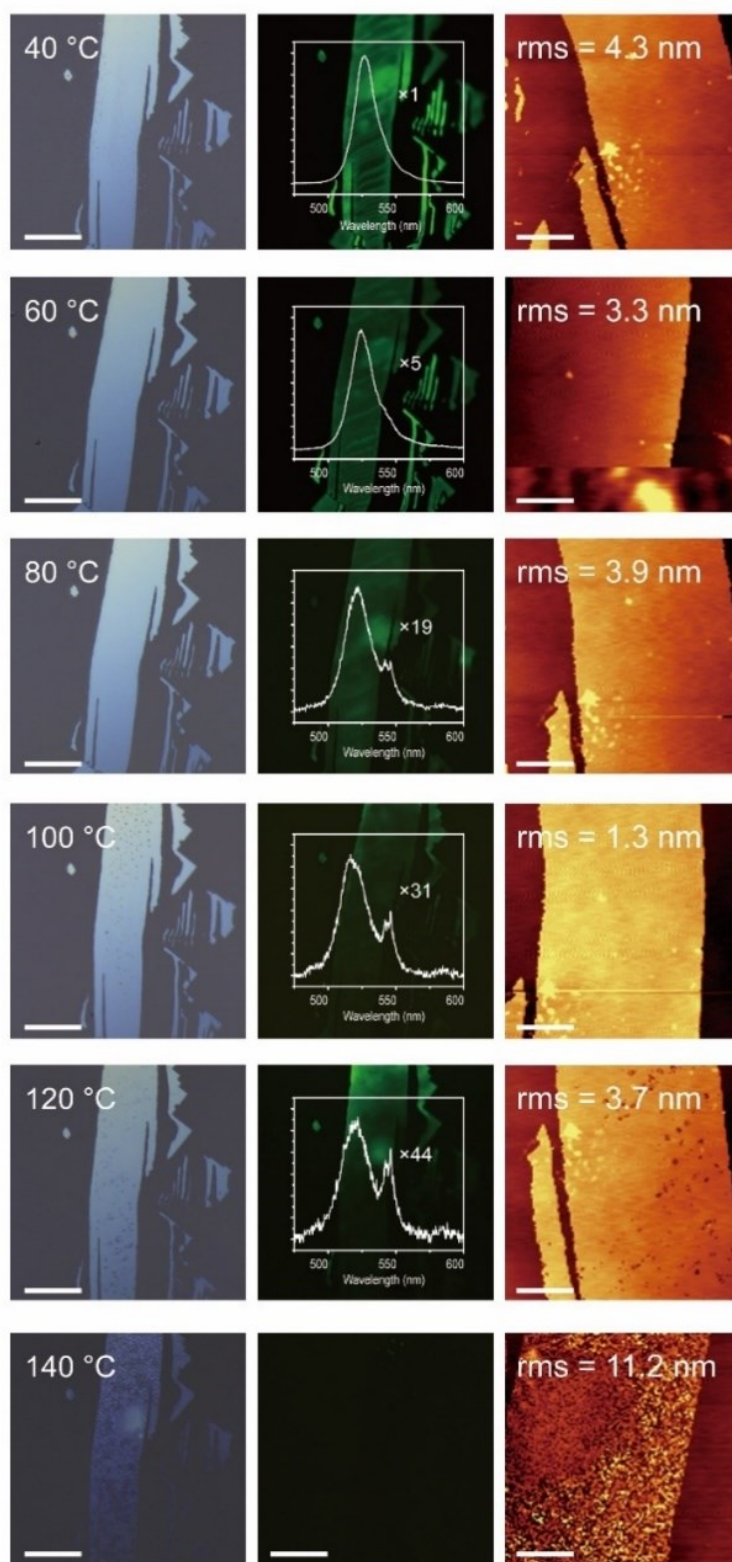

**Figure S6** Optic, fluorescent and AFM images of a 25nm-thick FAPbBr<sub>3</sub> sheets dependent on the heat temperature. The inset spectra are the PL emissions of 2D sheet.

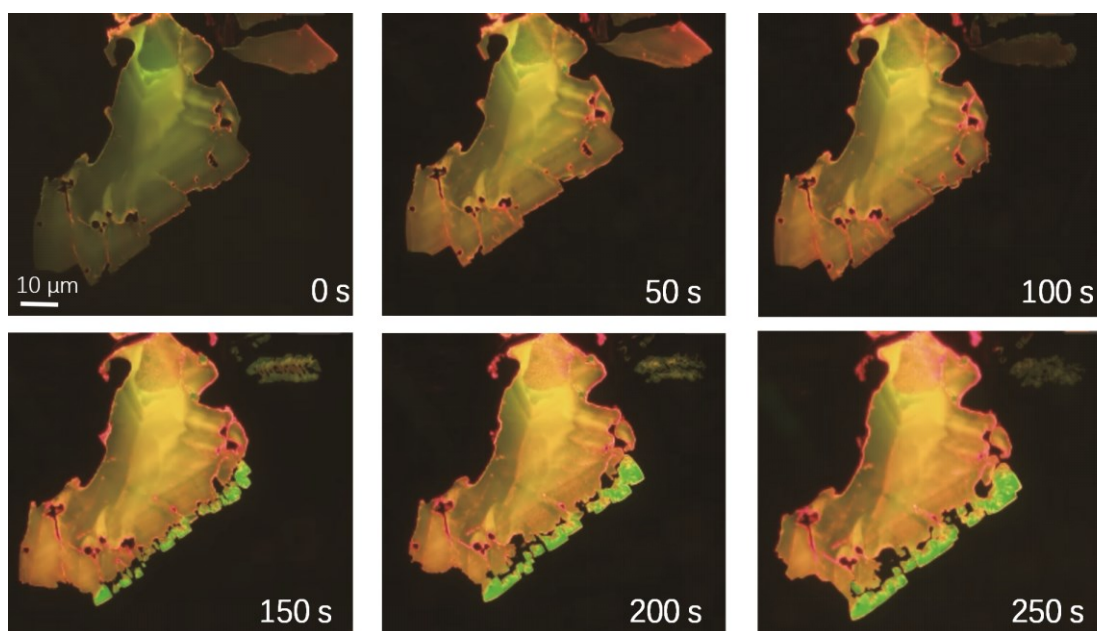

**Figure S7** In-situ fluorescent images of photoinduced phase segregation of mixed-halide 2D  $\text{FAPb}(\text{Br}_x\text{I}_{1-x})_3$  sheets

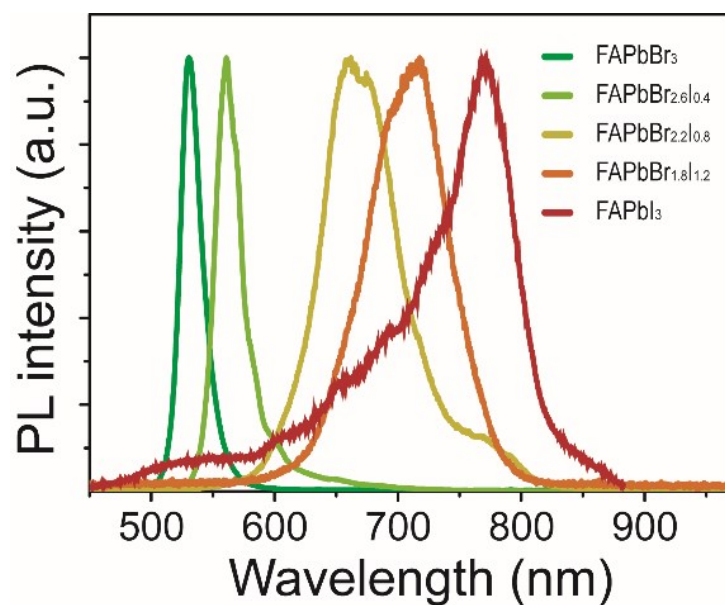

**Figure S8** The PL emissions of mixed-halide 2D  $\text{FAPb}(\text{Br}_x\text{I}_{1-x})_3$  sheets grown using the liquid-phase epitaxy technique.

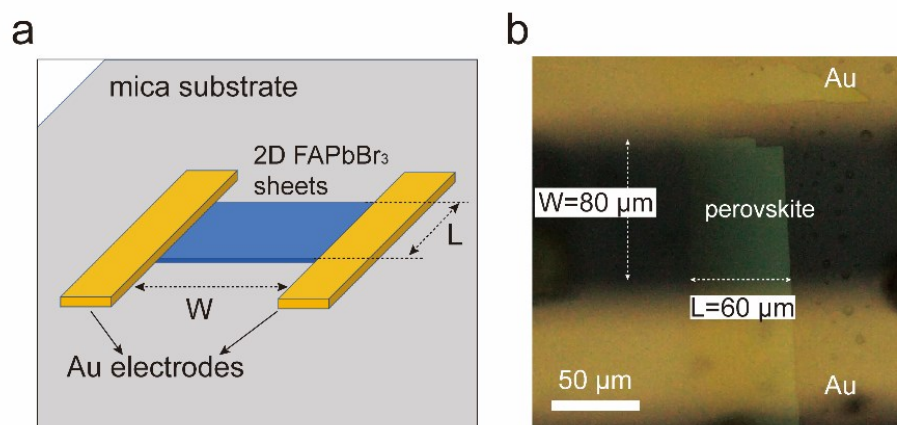

**Figure S9** The schematic (a) and optical microscope image (b) of the in-plane structured device for the SCLC measurements.

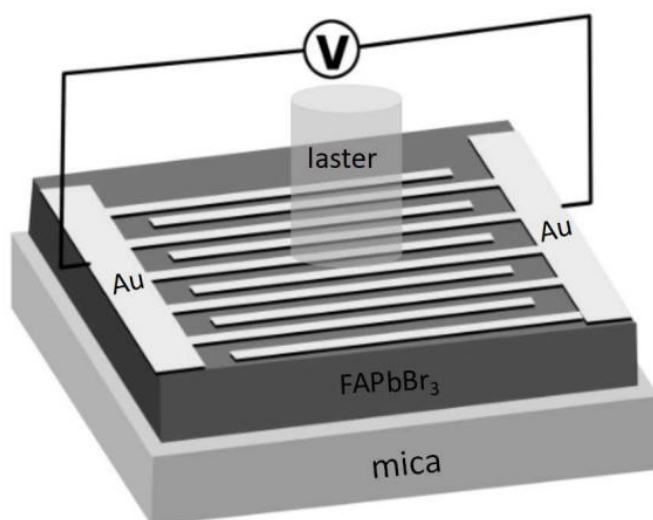

**Figure S10** Structure illustration of 2D FAPbBr<sub>3</sub>-based photodetector.

**Table S1 PL emission performance comparisons of FAPbBr<sub>3</sub>**

| perovskite                                       | PL (nm) | fwhm (nm) | lifetime (ns) | reference          |
|--------------------------------------------------|---------|-----------|---------------|--------------------|
| 2D FAPbBr <sub>3</sub> single-crystalline sheets | 530     | 20        | 17~140        | this work          |
| FAPbBr <sub>3</sub> thin film                    | 534     | 20.5      | 89.97         | 2020 <sup>2</sup>  |
|                                                  | 532     | 21        | 46.5          | 2019 <sup>3</sup>  |
|                                                  | 531.8   | 24.8      |               | 2018 <sup>4</sup>  |
|                                                  | 518     | 20        | 13.2          | 2018 <sup>5</sup>  |
|                                                  | 530     | 22.6      | 42.3          | 2017 <sup>6</sup>  |
|                                                  | 533     |           | 24            | 2017 <sup>7</sup>  |
|                                                  | 528     | 27        | 79.63         | 2017 <sup>8</sup>  |
|                                                  | 530     | 22        | 40            | 2016 <sup>9</sup>  |
|                                                  | 532.1   | 26.2      | 10.2          | 2016 <sup>10</sup> |
| FAPbBr <sub>3</sub> bulk single crystal          | 567     |           | 282±5         | 2018 <sup>11</sup> |
|                                                  | 577.5   |           | 72000         | 2017 <sup>12</sup> |
|                                                  | 587     |           | 2272          | 2016 <sup>13</sup> |

**Table S2 Summary of photodetector performances basing on FAPbBr<sub>3</sub> perovskites**

| Active material                                                              | $n_{\text{trap}}$<br>(cm <sup>-3</sup> ) | Responsivity<br>(A/W) | $\tau_{\text{raise}}/\tau_{\text{fall}}$<br>(ms) | Mobility<br>(cm <sup>2</sup> V <sup>-1</sup> S <sup>-1</sup> ) | Diffusion<br>length<br>( $\mu\text{m}$ ) | reference          |
|------------------------------------------------------------------------------|------------------------------------------|-----------------------|--------------------------------------------------|----------------------------------------------------------------|------------------------------------------|--------------------|
| 2D FAPbBr <sub>3</sub> single-crystalline sheets                             | 2.58×<br>10 <sup>11</sup>                | 730                   | 0.67/0.7                                         | 31                                                             | 1.2                                      | this work          |
| (OA)2FA <sub>n-1</sub> Pb <sub>n</sub> Br <sub>3n+1</sub><br>micro-platelets | -                                        | 32                    | 0.25/1.4<br>5                                    | -                                                              | -                                        | 2017 <sup>14</sup> |
| FAPbBr <sub>3</sub><br>microcrystals                                         | 6.98×<br>10 <sup>11</sup>                | 4000                  | 0.67/0.7<br>5                                    | -                                                              | -                                        | 2018 <sup>11</sup> |
| FAPbBr <sub>3</sub><br>nanoparticles                                         | -                                        | 8                     | 2600/30<br>0                                     | -                                                              | -                                        | 2020 <sup>15</sup> |
| FAPbBr <sub>3</sub> bulk single<br>crystals                                  | 9.60×<br>10 <sup>9</sup>                 | -                     | -                                                | 62±11                                                          | 19                                       | 2016 <sup>13</sup> |
|                                                                              | -                                        | -                     | -                                                | 14±2                                                           | 1.3                                      | 2015 <sup>16</sup> |

**References**

1. Y. Bai, H. X. Zhang, M. J. Zhang, D. Wang, H. Zeng, H. Xue, W. Z. Wu, Y. Xie, Y. X. Zhang, H. Jing, J. Su, H. H. Yu, Z. G. Hu, R. W. Peng, Y. C. Wu, *Nanoscale*, 2020, **12**, 1100.
2. Y. Q. Zu, J. Xi, L. Li, J. F. Dai, S. P. Wang, F. Yun, B. Jiao, H. Dong, X. Hou, Z. X. Wu, *ACS Appl. Mater. Interfaces*, 2020, **12**, 2835-2841.



3. H. Fang, W. Deng, X. J. Zhang, X. Z. Xu, M. Zhang, J. S. Jie, X. H. Zhang, *Nano Research*, 2019, **12**, 171-176.
4. D. Yu, F. Cao, Y. Gao, Y. Xiong, H. Zeng, *Adv. Funct. Mater.*, 2018, **28**, 1800248.
5. Y.-L. Tong, Y.-W. Zhang, K. Ma, R. Cheng, F. Wang, S. Chen, *ACS Appl. Mater. Interfaces*, 2018, **10**, 31603-31609.
6. S. Kumar, J. Jagielski, N. Kallikounis, Y.-H. Kim, C. Wolf, F. Jenny, T. Tian, C. J. Hofer, Y.-C. Chiu, W. J. Stark, T.-W. Lee, C.-J. Shih, *Nano Lett.*, 2017, **17**, 5277-5284.
7. I. Levchuk, A. Osvet, X. Tang, M. Brandl, J. D. Perea, F. Hoegl, G. J. Matt, R. Hock, M. Batentschuk, C. J. Brabec, *Nano Lett.*, 2017, **17**, 2765-2770.
8. Y.-H. Kim, G.-H. Lee, Y.-T. Kim, C. Wolf, H. J. Yun, W. Kwon, C. G. Park, T.-W. Lee, *Nano Energy*, 2017, **38**, 51-58.
9. L. Protesescu, S. Yakunin, M. I. Bodnarchuk, F. Bertolotti, N. Masciocchi, A. Guagliardi, M. V. Kovalenko, *J. Am. Chem. Soc.*, 2016, **138**, 14202-14205.
10. A. Perumal, S. Shendre, M. Li, Y. K. Tay, V. K. Sharma, S. Chen, Z. Wei, Q. Liu, Y. Gao, P. J. Buenconsejo, S. T. Tan, C. L. Gan, Q. Xiong, T. C. Sum, H. V. Demir, *Sci. Rep.*, 2016, **6**, 36733.
11. F. Y. Zhang, B. Yang, K. B. Zheng, S. Q. Yang, Y. J. Li, W. Q. Deng, R. X. He, *Nano-Micro Lett.*, 2018, **10**, 43.
12. E. Alarousu, A.M. El-Zohry, J. Yin, A. A. Zhumekenov, C. Yang, E. Alhabshi, L. Gereige, A. AlSaggaf, A. V. Malko, O. M. Bakr, O. F. Mohammed, *J. Phys. Chem. Lett.*, 2017, **8**, 4386-4390.
13. A. A. Zhumekenov, M. I. Saidaminov, M. A. Haque, E. Alarousu, S. P. Sarmah, B. Murali, I. Dursun, X.-H. Miao, A. L. Abdelhady, T. Wu, O. F. Mohammed, O. M. Bakr, *ACS Energy Lett.*, 2016, **1**, 32-37.
14. D. J. Yu, F. Cao, Y. L. Shen, X. H. Liu, Y. Zhu, H. B. Zeng, *J. Phys. Chem. Lett.*, 2017, **8**, 2565-2572.
15. S. K. Si, S. Paria, S. K. Karan, S. Ojha, A. K. Das, A. Maitra, A. Bera, L. Halder, A. De, B. B. Khatua, *Nanoscale*, 2020, **12**, 7214-7230.
16. W. Rehman, R. L. Milot, G.E. Eperon, C. Wehrenfenning, J. L. Boland, H. J. Snaith, M. b. Johnston, L.M. Herz, *Advance Materials*, 2015, **27**, 7938-7944.
